# Supplementary material for: Comorbidity in severe asthma requiring systemic corticosteroid therapy: cross-sectional data from the Optimum Patient Care Research Database and the British Thoracic Difficult Asthma Registry
Source: HighWire-hosted journal article supplement (doi:10.1136/thoraxjnl-2015-207630), 2016-01-27
Supplement: thoraxjnl-2015-207630supp.pdf [file thoraxjnl-2015-207630supp.pdf]

## Online Data Supplement

### **Comorbidity in Severe Asthma requiring systemic corticosteroid therapy - Cross-sectional data from the Optimum Patient Care Research Database and the British Thoracic Difficult Asthma Registry**

Joan Sweeney<sup>1</sup>; Chris C Patterson<sup>2</sup>, Andrew Menzies-Gow<sup>3</sup>, Rob M Niven<sup>4</sup>, Adel H Mansur<sup>5</sup>, Christine Bucknall<sup>6</sup>, Rekha Chaudhuri<sup>7</sup>, David Price<sup>8</sup>, Chris E Brightling<sup>9</sup>, Liam G Heaney<sup>1</sup> on behalf of the British Thoracic Society Difficult Asthma Network

<sup>1</sup>Centre for Infection and Immunity, Queen's University of Belfast, UK. <sup>2</sup>Centre for Public Health, Queen's University of Belfast, UK, <sup>3</sup>Royal Brompton Hospital, London, UK, <sup>4</sup>MAHSC, The University of Manchester & UHSM, Manchester, UK, <sup>5</sup>Severe and Brittle Asthma Unit, Birmingham Heartlands Hospital. <sup>6</sup>Department of Respiratory Medicine, Royal Infirmary, Glasgow, UK, <sup>7</sup>Department of Respiratory Medicine, Division of Immunology, Infection and Inflammation, University of Glasgow and Gartnavel General, Glasgow, UK, <sup>8</sup>Academic Primary Care, University of Aberdeen, UK, <sup>9</sup>Department of Infection, Inflammation and Immunity, Institute for Lung Health, University of Leicester, UK.

## **Methods**

### **The British Thoracic Society (BTS) Difficult Asthma Registry**

In 2007, the BTS Research Committee, in conjunction with physicians with a specialist interest in difficult asthma, established a National Registry for dedicated UK Difficult Asthma services. The aims of the group were to define clinical phenotypes in subjects with well-characterized severe asthma (SA), to facilitate research into the assessment and clinical management of difficult asthma, to develop and increase access to dedicated difficult asthma service and to standardise clinical care in specialist clinical supra-regional clinical centres (1).

There are currently eight dedicated Specialist Difficult Asthma Services submitting data to the UK Registry - Royal Brompton Hospital, London; Glenfield Hospital, Leicester; University Hospital of South Manchester; Birmingham Heartlands Hospital; Gartnavel Hospital, Glasgow; Stobhill Hospital, Glasgow, Southampton General Hospital and Belfast City Hospital. The Registry is hosted online by Dendrite Clinical Systems Ltd and collects password-protected, anonymous data after fully informed written consent has been obtained from patients. The registry records patient demographics including gender, age at diagnosis, occupation and BMI as well as disease characteristics such as asthma medication, exacerbations, and pulmonary function. Patients at all centres undergo a standardised multidisciplinary, systematic assessment of their asthma. All Registry centres follow protocols whereby patients have multiple investigations, including a thorough medical history and examination, pulmonary function tests, allergy assessment (skin-prick testing and/or radioallergosorbent test), blood tests (incorporating serum eosinophil count and

IgE), bone densitometry and complete health related quality of life and asthma control questionnaires (Asthma Control Questionnaire (ACQ), Asthma Quality of Life Questionnaire (AQLQ), EuroQol EQ-5D-Generic quality of life questionnaire, Hospital, Anxiety and Depression Scale (HAD)). Epworth Sleepiness Scale is also completed by patients and overnight oximetry/polysomnography performed if indicated. All Registry data including objective measures as listed above were examined for analysis.

### **The Optimum Patient Care Research Database**

The OPCRd is a large, longitudinal, primary care database offering anonymised research quality data with a focus on respiratory disease. It contains all point of care records for respiratory patients including comorbid disease information and prescriptions issued at time of healthcare contact. OPCRd currently holds anonymised data on approximately 700,000 patients with asthma. The distribution of participating practices across the UK is shown in Figure E1. For the purposes of statistical analysis, geographical areas of practices were aggregated into six regions as follows.

| Region                     | Postcode Areas                                                               |
|----------------------------|------------------------------------------------------------------------------|
| London                     | CR, E, EN, HA, IG, KT, N, NW, RM, SM, TW, UB, W                              |
| South                      | BA, BS, CT, GL, GU, HP, ME, MK, OX, PL, RG, RH, SL, SN, TA                   |
| East                       | CB, CO, IP, LN, LU, NR, PE, SS                                               |
| Midlands                   | B, CV, DE, LE, NG, NN, ST, WS, WV                                            |
| North                      | BD, CA, CH, CW, DH, FY, HD, HG, HX, L, LA, LS, M, NE, OL, SR, TS, WA, WN, YO |
| Outside England or missing | AB, BT, DD, EH, G, ML, PH, SY                                                |

Figure E1 **OPCRD practice distribution**

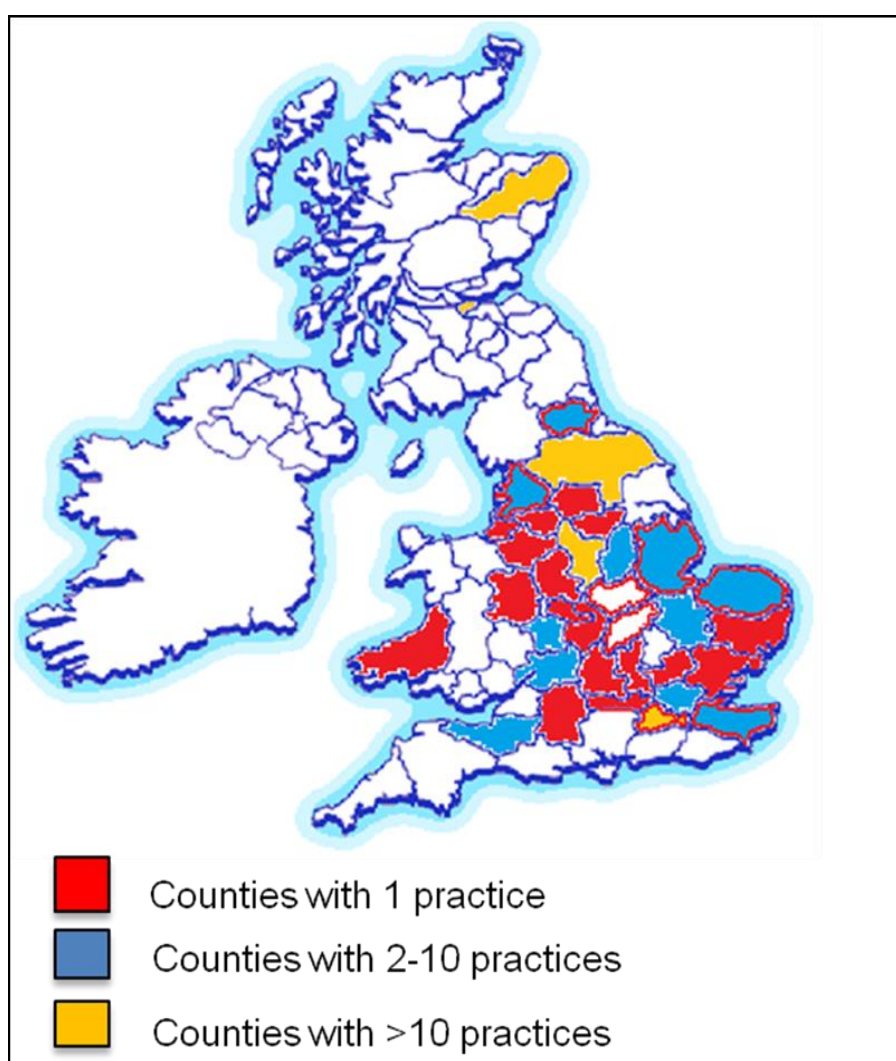

### **OPCRD Cohort Definition**

#### **Severe Asthma population**

All subjects must have had a Read Code diagnosis of asthma in the GP record and have received prescriptions for Step 5 GINA asthma treatment during a 2-year qualification period defined as continuous or frequent use of OCS and high dose inhaled corticosteroid maintained at 2000mcg BDP equivalent/day (2). It is not possible to identify maintenance or daily OCS use from GP prescription records so in order to capture subjects receiving continuous or with frequent use of OCS, an inclusion criterion of  $\geq 4$  prescriptions for

systemic corticosteroids in each of the two study years was specified for this population. A sub-group of SA subjects who received maintenance systemic corticosteroids quantified by  $\geq 6$  OCS prescriptions in both years of the study was further evaluated in a sensitivity analysis.

### **Mild/moderate asthma population**

The asthma population within OPCRd are coded according to their asthma therapy and corresponding GINA steps of asthma management. To be included in the mild/moderate asthma population, all subjects must have had a Read Code diagnosis of asthma and have received prescriptions for Step 2-3 GINA (Read Code for GINA Step 2 or Step 3) treatment during the 2-year qualifying period defined as 'regular preventer therapy with add on asthma therapy'. This included inhaled corticosteroid therapy of 200-800mcg BDP equivalent dose/day with or without long-acting beta-agonist therapy or if control was still inadequate other asthma therapies such as leukotriene receptor antagonist or SR theophylline may have been prescribed (2). This mild/moderate population may have received none or rescue courses of OCS only during the 2 year qualifying period.

### **Control population**

To be considered part of the 'non-asthmatic control' population, subjects must not have had a Read Code diagnosis of asthma but must have had a Read Code diagnosis of rhinitis or received therapy to treat rhinitis (i.e. drugs used in nasal allergy). As the OPCRd is a respiratory database, this population was chosen as the 'non-asthmatic controls' as they did

not have any exposure to OCS or have any other condition that warranted OCS use and they did not have a Read Code/ diagnosis for asthma.

### **Matching criteria**

Matching criteria was based on subjects:

- Age
- Gender
- Year of birth

### **Exclusion criteria**

For all study subjects and to minimize the risk of confounding by non-asthmatic systemic steroid exposure, subjects with any of the following conditions (for which systemic corticosteroid treatment could be prescribed) were excluded from the study population:

- Crohn's disease
- Ulcerative colitis
- Autoimmune diseases – autoimmune hepatitis
- Joint and muscle diseases – rheumatoid arthritis, polymyalgia rheumatica
- Chronic respiratory conditions other than asthma, i.e. Chronic Obstructive Pulmonary Disease (COPD); bronchiectasis; cystic fibrosis; interstitial pulmonary fibrosis; tuberculosis.

Figure E2 presents flowcharts for OPCR data extraction and cohort matching.

**Figure E2 OPCR data extraction and cohort matching flowcharts for severe (refractory) asthma and controls**

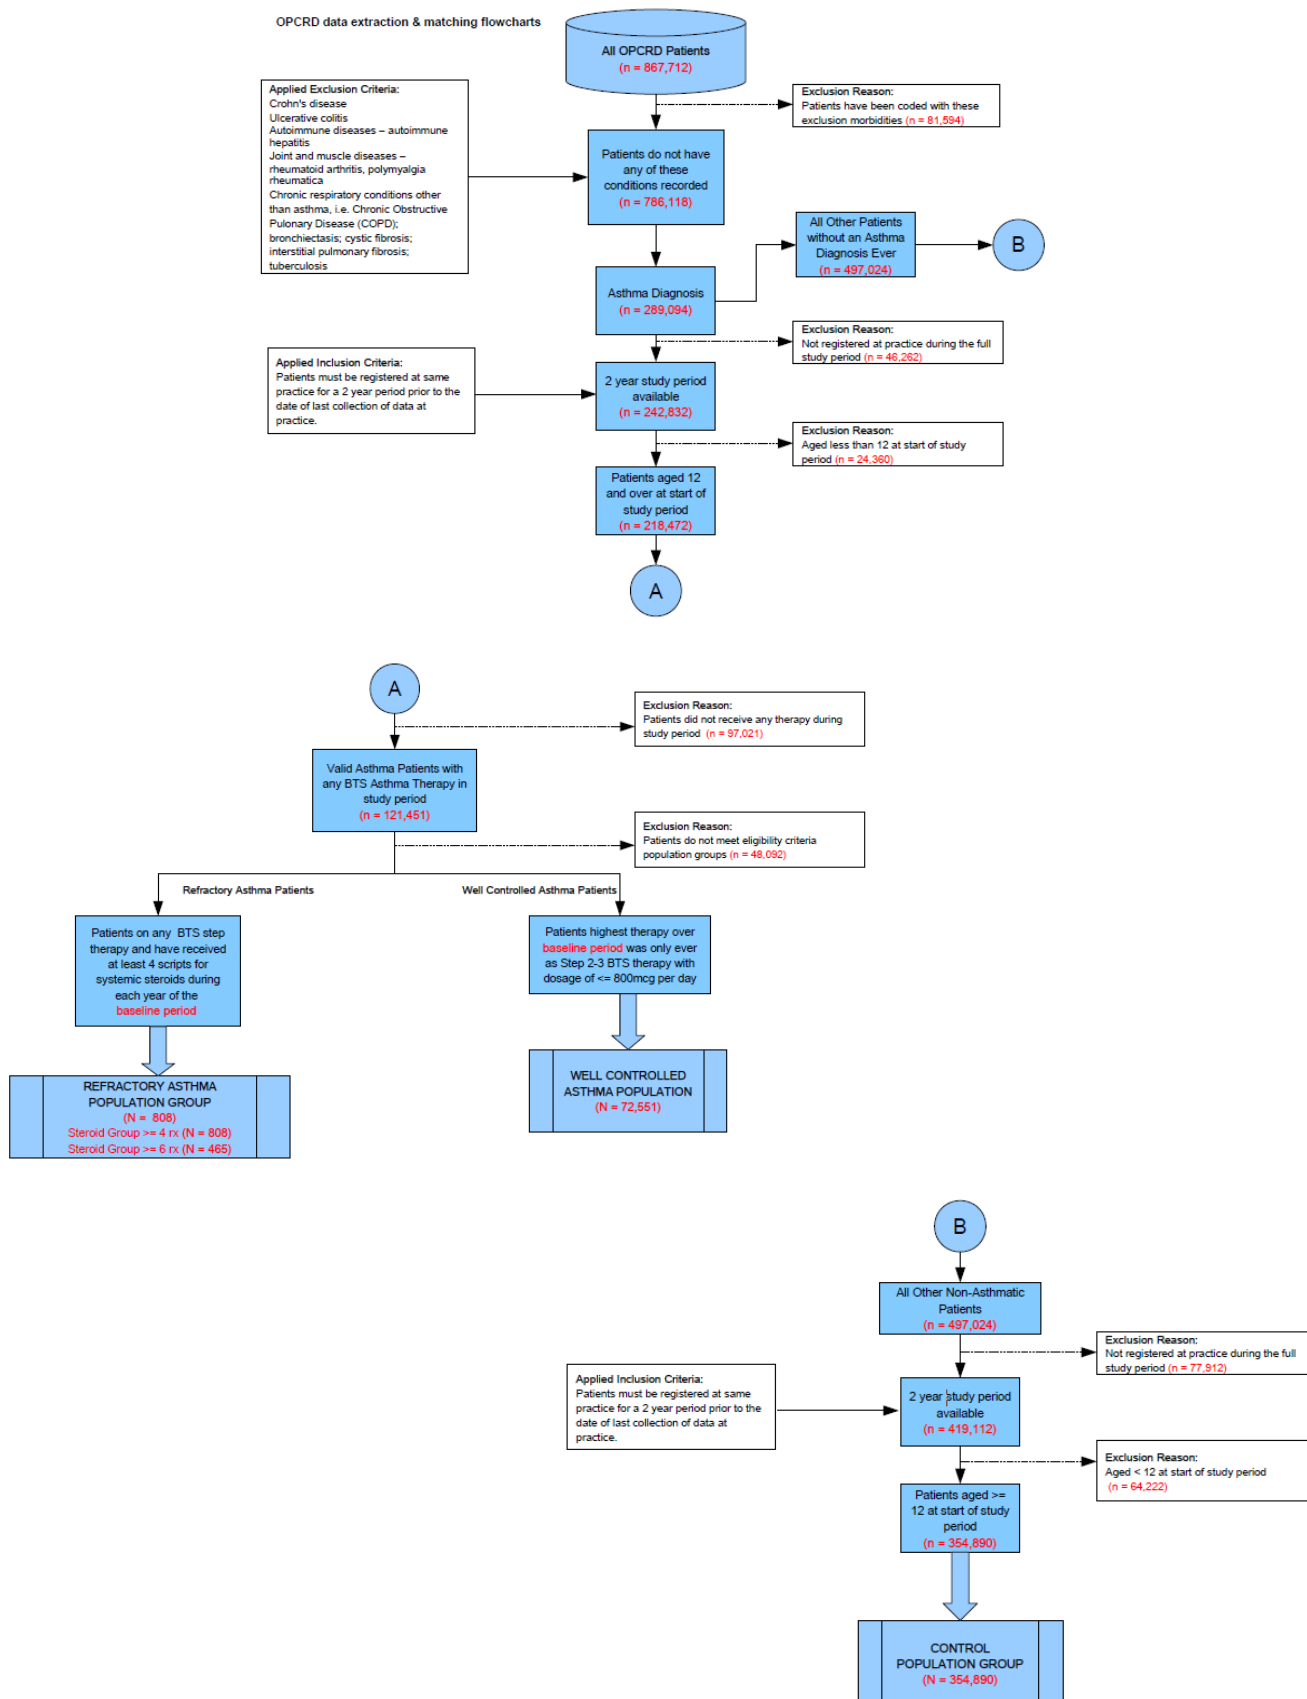

### Matching of well controlled asthma patients to severe (refractory) asthma patients

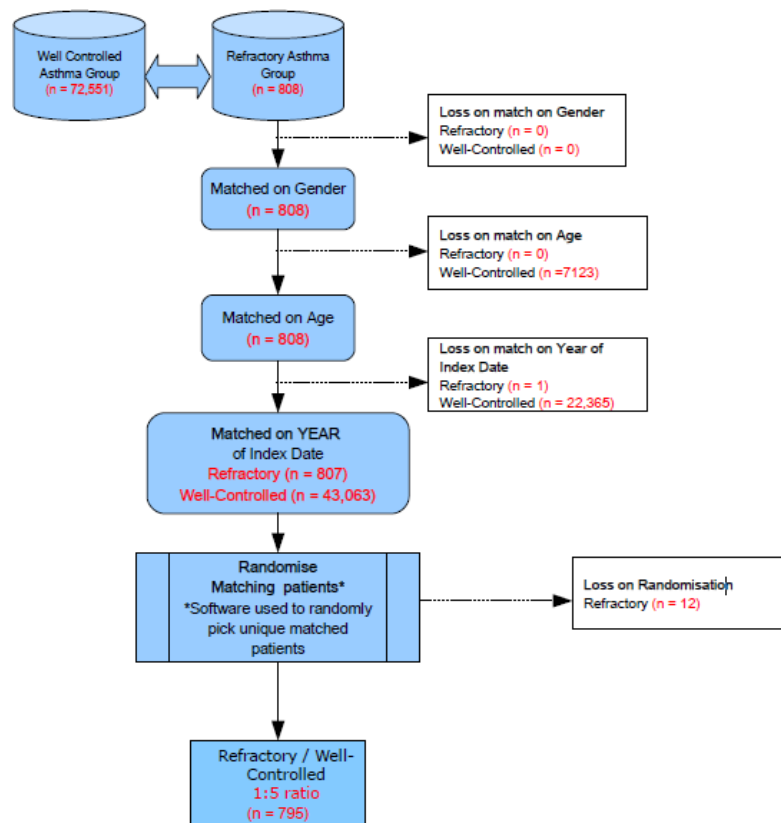

### Matching of non-asthma patients to severe (refractory) asthma patients

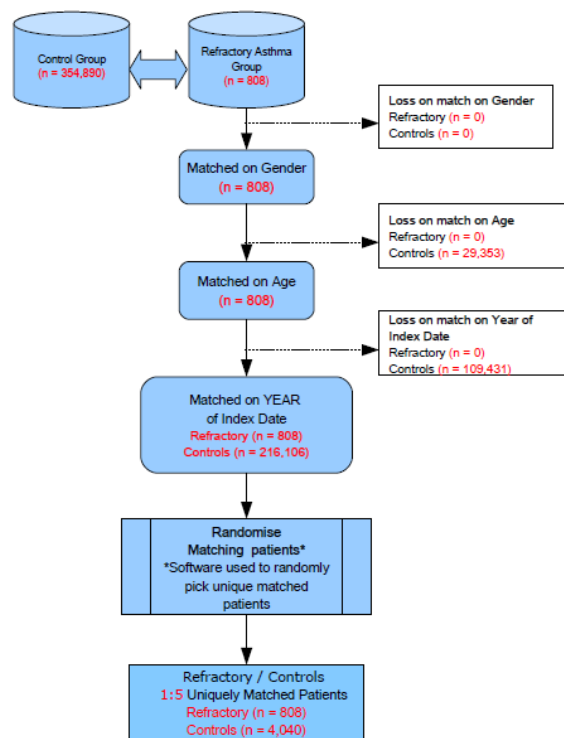

## Study period

Eligibility for the cross-sectional analysis was evaluated over a 2-year qualifying period using the previously-defined inclusion/exclusion criteria. This was the latest 2-year period within the OPCRd which at time of protocol design was 1 April 2011– 30 March 2013. In OPCRd the latest date of download from some practices was prior to 1 April 2011 or similarly, the latest download may have taken place after 30 March 2013. In those circumstances, the date of the 2-year qualifying period differed from that stipulated in the protocol.

Figure E3 represents the study period for the OPCRd analysis.

Figure E3 **Schematic for definition of study period.**

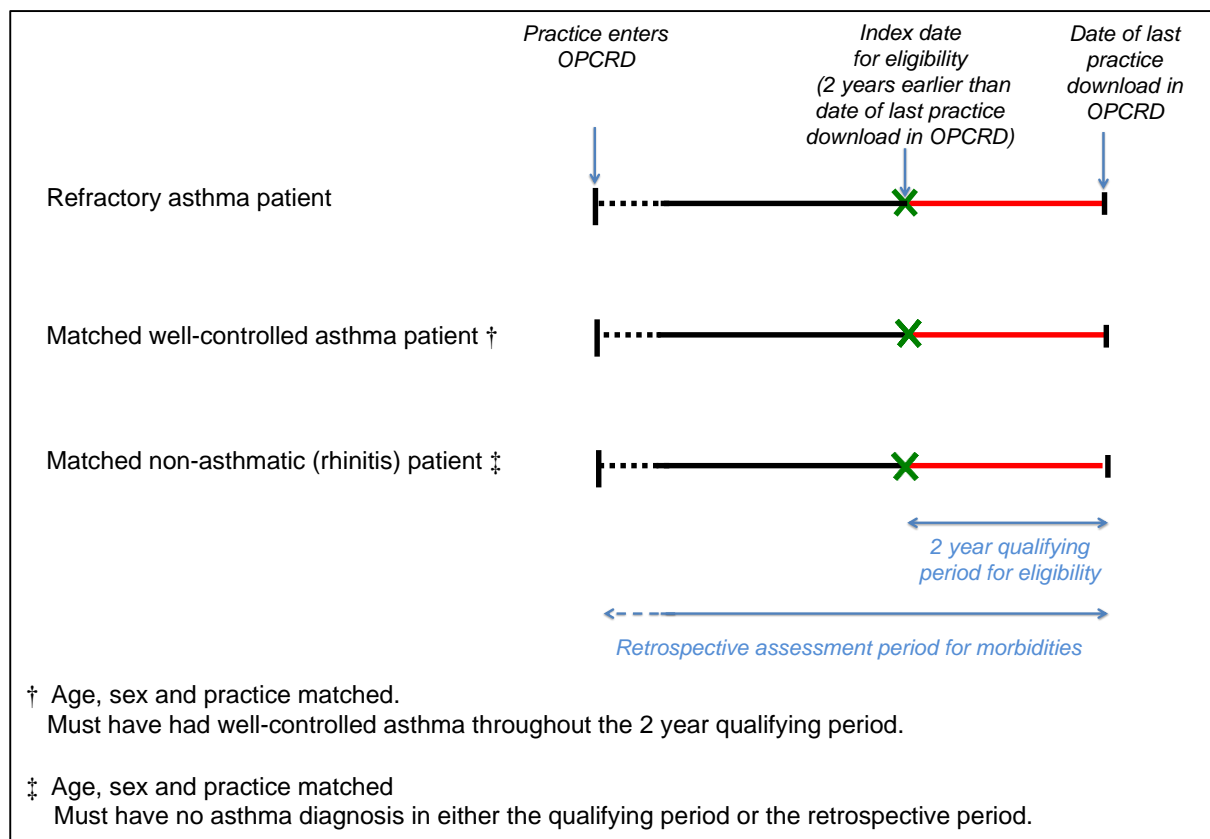

## Morbidity evaluations OPCRd

The most commonly reported adverse effects of OCS were evaluated (Table E1) (3-16). Read Codes are a coded thesaurus of clinical terms and have been in use in the NHS since 1985.

They are a basic means by which clinicians record patient findings and procedures across health and social care IT systems and are the clinical classification system currently used in primary care in the UK. OPCRD currently uses Version 2 Read Codes and all relevant coding was extracted from the NHS Read Code Browser and codes relating to the adverse effects listed below were then extracted from the OPCRD 'clinical' file for analysis. Rates are reported for each cohort and the rates in SA subjects are compared with the rates in mild/moderate asthma and non-asthmatic controls.

**Table E1** Adverse effects of OCS use

| <b>Morbidity/Adverse Effect</b>                                  |
|------------------------------------------------------------------|
| Osteoporosis                                                     |
| Fracture                                                         |
| Diabetes                                                         |
| Hypertension                                                     |
| Ophthalmic effects – cataracts, glaucoma                         |
| Dyspeptic disorders – peptic ulcer disease                       |
| Psychiatric events – anxiety, depression, agitation              |
| Infections                                                       |
| Sleep disturbances – insomnia                                    |
| Dyslipidaemia                                                    |
| Weight gain                                                      |
| Skin conditions – bruising, thinning, striae, skin atrophy, acne |
| Muscle weakness/myopathy                                         |
| Cardiovascular conditions – MI, heart failure                    |
| Oral candidiasis                                                 |
| Hyperglycaemia                                                   |
| Adrenal suppression/insufficiency                                |
| Osteonecrosis                                                    |
| Cushingoid changes – moon facies, abdominal obesity              |

## Study size

The power of this study to detect excesses of steroid induced morbidity depends on the size of the groups, the frequency of the morbidity in the comparison group (mild/moderate asthmatic population or non-asthmatic population) and the magnitude of the excess rate expressed in terms of the relative risk, the ratio of the morbidity rates in the severe asthma and control groups. Table E2 shows the power of the main study of 800 asthma subjects on maintenance OCS and of the sub-group analysis of 450 receiving  $\geq 6$  OCS in each qualifying year to detect various relative risks depending on the prevalence of the morbidity.

**Table E.2** Retrospective power assessment of a study of 800/450 asthma subjects on maintenance OCS to detect a given increase in risk as statistically significant ( $P < 0.05$ ) assuming a comparison group 5-times the size.

| Prevalence of morbidity in comparison group | Power of study of 800 patients (main analysis) |      |      |      |      |
|---------------------------------------------|------------------------------------------------|------|------|------|------|
|                                             | Relative risk                                  |      |      |      |      |
|                                             | x1.25                                          | x1.5 | x2.0 | x2.5 | x3.0 |
| 1%                                          | 8%†                                            | 22%  | 58%  | 84%  | 100% |
| 2%                                          | 13%                                            | 39%  | 86%  | 99%  | 100% |
| 3%                                          | 19%                                            | 54%  | 96%  | 100% | 100% |
| 4%                                          | 24%                                            | 66%  | 99%  | 100% | 100% |
| 5%                                          | 29%                                            | 76%  | 100% | 100% | 100% |
| 10%                                         | 53%                                            | 97%  | 100% | 100% | 100% |
| 15%                                         | 73%                                            | 100% | 100% | 100% | 100% |
| 20%                                         | 68%                                            | 100% | 100% | 100% | 100% |
| 25%                                         | 87%                                            | 100% | 100% | 100% | 100% |
| 30%                                         | 100%                                           | 100% | 100% | 100% | 100% |

† Stata sample size and power calculation command: **sampsi 0.0125 0.01, n1(800) r(5)**

| Prevalence of morbidity in comparison group | Power of study of 450 patients (sub-group analysis) |      |      |      |      |
|---------------------------------------------|-----------------------------------------------------|------|------|------|------|
|                                             | Relative risk                                       |      |      |      |      |
|                                             | x1.25                                               | x1.5 | x2.0 | x2.5 | x3.0 |
| 1%                                          | 5%†                                                 | 13%  | 38%  | 62%  | 84%  |
| 2%                                          | 9%                                                  | 24%  | 64%  | 89%  | 97%  |
| 3%                                          | 12%                                                 | 34%  | 80%  | 97%  | 100% |
| 4%                                          | 15%                                                 | 44%  | 90%  | 99%  | 100% |
| 5%                                          | 18%                                                 | 52%  | 95%  | 100% | 100% |
| 10%                                         | 33%                                                 | 83%  | 100% | 100% | 100% |
| 15%                                         | 49%                                                 | 96%  | 100% | 100% | 100% |
| 20%                                         | 63%                                                 | 99%  | 100% | 100% | 100% |
| 25%                                         | 76%                                                 | 100% | 100% | 100% | 100% |
| 30%                                         | 86%                                                 | 100% | 100% | 100% | 100% |

† Stata sample size and power calculation command: **sampsi 0.0125 0.01, n1(450) r(5)**

## Statistical analysis

The conditional logistic regression model (17) was employed for statistical analysis to take account of the matching of severe asthma cases with well-controlled asthma controls and rhinitis (non-asthma) controls.

Suppose that the  $i^{\text{th}}$  of  $I$  matched groups contains one case and  $M_i$  matched controls.

Denote by  $\mathbf{x}_{i0} = (\mathbf{x}_{i01}, \dots, \mathbf{x}_{i0K})$  the  $\mathbf{K}$ -vector of covariates ( $\mathbf{k}=1, \dots, \mathbf{K}$ ) for case  $i$  ( $i=1, \dots, I$ ), and denote by  $\mathbf{x}_{ij} = (\mathbf{x}_{ij1}, \dots, \mathbf{x}_{ijK})$  the corresponding vector for the  $j$ th control ( $j=1, \dots, M_i$ ). The conditional likelihood may be obtained as

$$\prod_{i=1}^I \frac{\exp(\sum_{k=1}^K \beta_k x_{i0k})}{\sum_{j=0}^{M_i} \exp(\sum_{k=1}^K \beta_k x_{ijk})} = \prod_{i=1}^I \frac{1}{1 + \sum_{j=1}^{M_i} \exp\{\sum_{k=1}^K \beta_k (x_{ijk} - x_{i0k})\}}$$

where  $\beta_k$  represents the regression parameter for covariate  $\mathbf{x}_k$  ( $\mathbf{k}=1, \dots, \mathbf{K}$ ).

This likelihood can be maximised to obtain estimates  $\mathbf{b}_k$  of  $\beta_k$  together with their standard errors  $\text{SE}(\mathbf{b}_k)$  ( $\mathbf{k}=1, \dots, \mathbf{K}$ ). These estimates may be antilogged to provide odds ratios (OR),  $\exp(\mathbf{b}_k)$ , and 95% confidence limits (CI),  $\exp(\mathbf{b}_k \pm 1.96 \text{ SE}(\mathbf{b}_k))$  ( $\mathbf{k}=1, \dots, \mathbf{K}$ ).

The covariates status (coded as case=1, control=0) and geographical region (coded as a series of dummy variables) were included in all analyses. Sample STATA commands for each analysis, with the adverse event non-insulin dependent diabetes (NIDDM), are given below,

**xi:clogit NIDDM status i.region, group(MATCH\_WELLCNTRL) or**  
**xi:clogit NIDDM status i.region, group(MATCH\_RHINITIS) or**

where MATCH\_WELLCNTRL identifies the matched groups of severe asthma and well-controlled asthma controls

and MATCH\_RHINITIS identifies the matched groups of severe asthma and rhinitis (non-asthmatic) controls.

## Results

### **Sub-group analysis of severe asthma subjects receiving $\geq 6$ OCS**

Minor change was noted in prevalence rates in this analysis (Table E3). The odds of osteopenia in SA compared to non-asthma controls increased 2-fold from the original analysis to OR of 8.72 (95% CI 5.15-14.75) from OR of 6.68 (4.28-10.43). Prevalence rates and OR for fractures in refractory asthma compared to controls was no longer statistically significant. Similarly, the rates and OR of cardiovascular disease in SA compared to mild/moderate asthma failed to reach statistical significance.

**Table E3** Sub-group analysis of severe asthma subjects receiving  $\geq 6$  OCS in each qualifying year OPCRd

| <b>Morbidity</b>                                      | <b>Severe asthma (%)</b><br><b>n=465</b> | <b>Mild/moderate asthma (%)</b><br><b>n=2280</b> | <b>OR (95% CI)</b> | <b>p-value</b> | <b>Non-asthma controls (%)</b><br><b>n=1375</b> | <b>OR (95%CI)</b> | <b>p-value</b> |
|-------------------------------------------------------|------------------------------------------|--------------------------------------------------|--------------------|----------------|-------------------------------------------------|-------------------|----------------|
| <b>Type II diabetes</b>                               | 53(11%)                                  | 161(7%)                                          | 1.69(1.22-2.35)    | 0.001          | 89(7%)                                          | 1.86(1.30-2.66)   | 0.001          |
| <b>Obesity (BMI &gt;30)</b>                           | 194(42%)                                 | 808(35%)                                         | 1.30(1.06-1.60)    | 0.010          | 328(24%)                                        | 2.29(1.83-2.85)   | p<0.001        |
| <b>Osteopenia</b>                                     | 53(11%)                                  | 55(2%)                                           | 5.21(3.52-7.69)    | p<0.001        | 20(2%)                                          | 8.72(5.15-14.75)  | p<0.001        |
| <b>Osteoporosis</b>                                   | 86(19%)                                  | 99(4%)                                           | 5(3.68-7.69)       | p<0.001        | 43(3%)                                          | 7.03(4.79-10.31)  | p<0.001        |
| <b>Fracture</b>                                       | 22(5%)                                   | 79(4%)                                           | 1.38(0.85-2.24)    | 0.19           | 50(4%)                                          | 1.32(0.79-2.20)   | 0.29           |
| <b>Dyspeptic disorders</b>                            | 318(68%)                                 | 790(35%)                                         | 4.08(3.30-5.05)    | p<0.001        | 337(25%)                                        | 6.66(5.29-8.39)   | p<0.001        |
| <b>Glaucoma</b>                                       | 23(5%)                                   | 88(4%)                                           | 1.30(0.81-2.07)    | 0.28           | 45(3%)                                          | 1.54(0.92-2.57)   | 0.10           |
| <b>Cataract</b>                                       | 51(11%)                                  | 127(6%)                                          | 2.09(1.48-2.94)    | p<0.001        | 59(4%)                                          | 2.75(1.86-4.06)   | p<0.001        |
| <b>Cardiovascular disease</b>                         | 48(10%)                                  | 176(8%)                                          | 1.38(0.98-1.93)    | 0.06           | 97(7%)                                          | 1.52(1.06-2.18)   | 0.024          |
| <b>Hypertension</b>                                   | 163(35%)                                 | 680(30%)                                         | 1.27(1.03-1.57)    | 0.026          | 350(26%)                                        | 1.58(1.26-1.98)   | p<0.001        |
| <b>Psychiatric conditions/<br/>Anxiety/depression</b> | 173(37%)                                 | 707(31%)                                         | 1.32(1.07-1.62)    | 0.009          | 352(26%)                                        | 1.72(1.38-2.15)   | p<0.001        |
| <b>Hypercholesterolemia</b>                           | 75(16%)                                  | 338(15%)                                         | 1.10(0.84-1.45)    | 0.47           | 148(11%)                                        | 1.59(1.18-2.15)   | 0.002          |
| <b>Sleep disorder</b>                                 | 19(4%)                                   | 56(3%)                                           | 1.69(1.00-2.87)    | 0.049          | 22(2%)                                          | 2.62(1.41-4.89)   | 0.002          |
| <b>Chronic kidney disease</b>                         | 74(16%)                                  | 202(9%)                                          | 1.95(1.46-2.60)    | p<0.001        | 93(7%)                                          | 2.61(1.88-3.61)   | p<0.001        |

## References

- (1) Heaney LG, Brightling CE, Menzies-Gow A, Stevenson M, Niven RM, British Thoracic Society Difficult Asthma Network. Refractory asthma in the UK: cross-sectional findings from a UK multicentre registry. *Thorax* 2010 Sep;65(9):787-794.
- (2) Global Initiative for Asthma (GINA). *Global Strategy for Asthma Management and Prevention* 2014. Available from: <http://www.ginasthma.org/>.
- (3) Sarnes E, Crofford L, Watson M, Dennis G, Kan H, Bass D. Incidence and US Costs of Corticosteroid-Associated Adverse Events: A Systematic Literature Review. *Clin Ther* 2011 10;33(10):1413-1432.
- (4) Manson SC, Brown RE, Cerulli A, Vidaurre CF. The cumulative burden of oral corticosteroid side effects and the economic implications of steroid use. *Respir Med* 2009 7;103(7):975-994.
- (5) Walsh LJ, Wong CA, Osborne J, Cooper S, Lewis SA, Pringle M, et al. Adverse effects of oral corticosteroids in relation to dose in patients with lung disease. *Thorax* 2001;56(4):279-284.
- (6) Smyllie H, Connolly C. Incidence of serious complications of corticosteroid therapy in respiratory disease A retrospective survey of patients in the Brompton Hospital. *Thorax* 1968;23(6):571-581.
- (7) Rees, H.A. & Williams, D.A. Long-term steroid therapy in chronic intractable asthma. A study of 317 adult asthmatics on continuous steroid therapy for an average period of 2 1/2 years. *Br Med J* 1962;1(5292):1575-1579.
- (8) Lieberman P, Patterson R, Kunske R. Complications of long-term steroid therapy for asthma. *J Allergy Clin Immunol* 1972;49(6):329-336.
- (9) Pearson RB, Baylis J, Smellie H. Treatment of chronic asthma with prednisolone and the newer steroids. *Br Med J* 1961;1(5222):315.
- (10) Fardet L, Flahault A, Kettaneh A, Tiev K, Génèreau T, Tolédano C, et al. Corticosteroid-induced clinical adverse events: frequency, risk factors and patient's opinion. *Br J Dermatol* 2007;157(1):142-148.
- (11) Zazzali JL, Broder M, Chang E. Oral Corticosteroid Use Increases the Risk of Glucocorticoid-related Adverse Events in Asthmatics. *J Allergy Clin Immunol* 2012 02/01;129(2):AB74.
- (12) Fitzsimons R, Grammer LC, Halwig JM, Aksamit T, Patterson R. Prevalence of adverse effects in corticosteroid dependent asthmatics. *N Engl J Allergy Proc* 1988;9(2):157-162.
- (13) Poetker DM, Reh DD. A comprehensive review of the adverse effects of systemic corticosteroids. *Otolaryngol Clin North Am* 2010 08;43(4):753-768.
- (14) Shah M, Chaudhari S, McLaughlin TP, Kan HJ, Bechtel B, Dennis GJ, et al. Cumulative Burden of Oral Corticosteroid Adverse Effects and the Economic Implications of Corticosteroid Use in Patients With Systemic Lupus Erythematosus. *Clin Ther* 2013;35(4):486-497.
- (15) Ethgen O, de Lemos Esteves F, Bruyere O, Reginster J. What do we know about the safety of corticosteroids in rheumatoid arthritis? *Current Medical Research & Opinion* 2013;29(9):1147-1160.
- (16) Zazzali JL, Broder MS, Omachi MD, Chang E, Sun GH, Raimundo K. Risk of corticosteroid-related adverse events in asthma patients with high oral corticosteroid use. *Allergy Asthma Proc*. 2015 Jul;36(4):268-74. doi: 10.2500/aap.2015.36.3863
- (17) Breslow NE, Day NE: Statistical methods in cancer research: Volume I - The design and analysis of case control studies. IARC Scientific Publications No. 32, Lyon, 1980.
